# Supplementary material
Source: PubMed Central journal article supplement (PMC2948588)

# Supplement 1 MMTV/MDM2 and MMTV/MDM2DD mice showed normal puberty and pregnancy

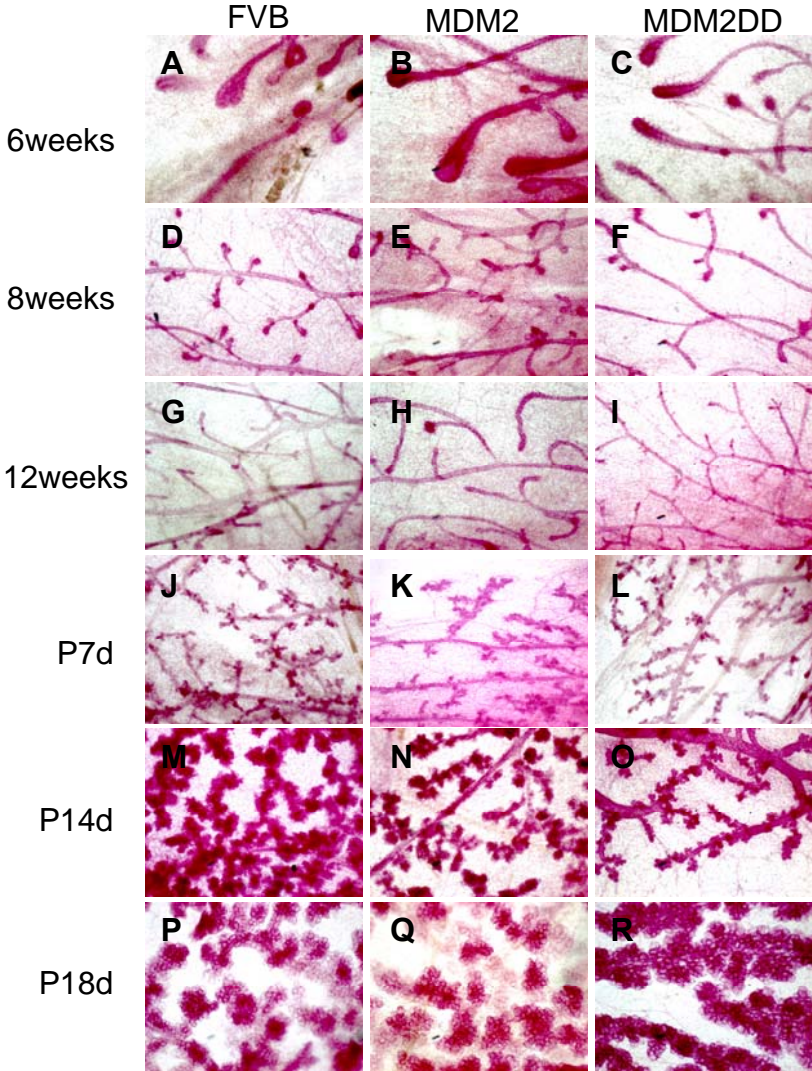

# Supplement 2 MMTV/MDM2 and MMTV/MDM2DD mice showed normal Lactation

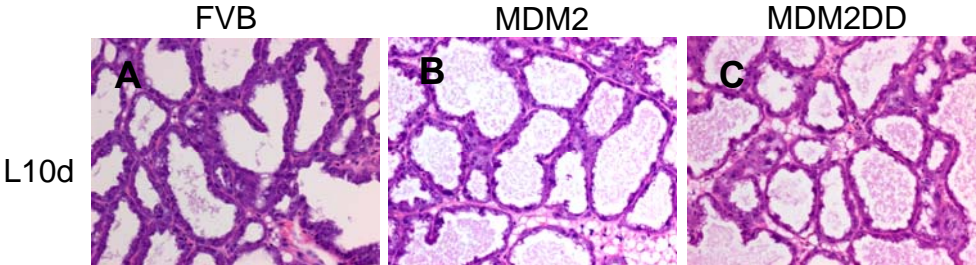

D

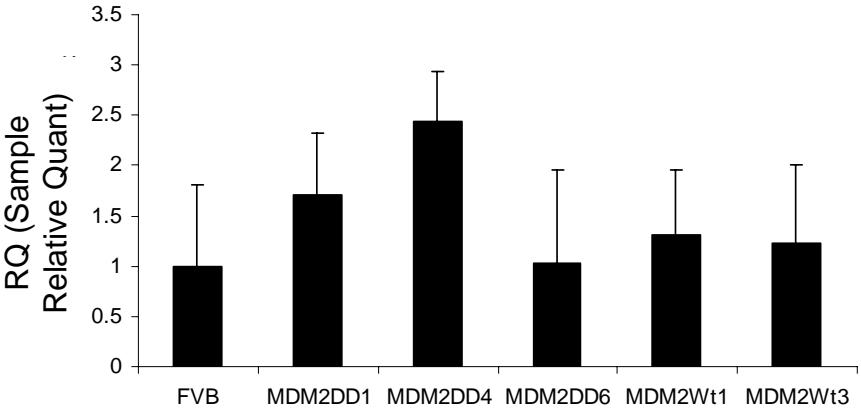

# Supplement 3 MMTV/MDM2DD mice showed decreased apoptosis during involution

**A**

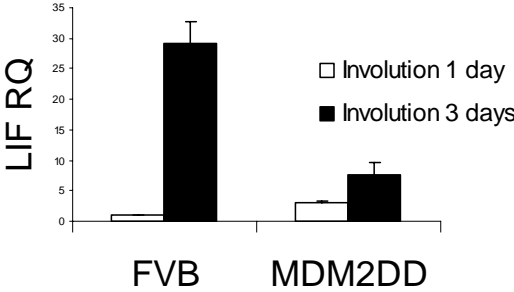

**B**

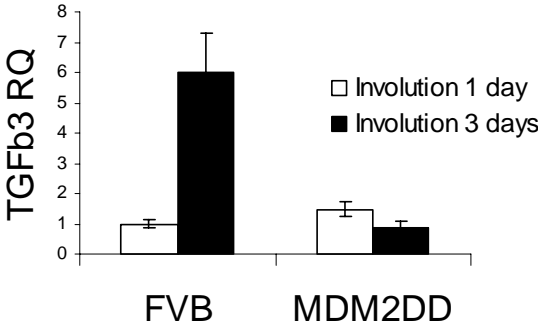

Supplement: NIHMS228700-supplement-1.pdf [file NIHMS228700-supplement-1.pdf]
